# The mood stabiliser lithium suppresses PIP<sub>3</sub> signalling in Dictyostelium and human cells

Jason S. King<sup>1,4,\*</sup>, Regina Teo<sup>1,\*</sup>, Jonathan Ryves<sup>1</sup>, Jonathan V. Reddy<sup>1</sup>, Owen Peters<sup>1</sup>, Ben Orabi<sup>2</sup>, Oliver Hoeller<sup>3</sup>, Robin S. B. Williams<sup>2</sup> and Adrian J. Harwood<sup>1,‡</sup>

## SUMMARY

Bipolar mood disorder (manic depression) is a major psychiatric disorder whose molecular origins are unknown. Mood stabilisers offer patients both acute and prophylactic treatment, and experimentally, they provide a means to probe the underlying biology of the disorder. Lithium and other mood stabilisers deplete intracellular inositol and it has been proposed that bipolar mood disorder arises from aberrant inositol (1,4,5)-trisphosphate [IP<sub>3</sub>, also known as Ins(1,4,5)P<sub>3</sub>] signalling. However, there is no definitive evidence to support this or any other proposed target; a problem exacerbated by a lack of good cellular models. Phosphatidylinositol (3,4,5)-trisphosphate [PIP<sub>3</sub>, also known as PtdIns(3,4,5)P<sub>3</sub>] is a prominent intracellular signal molecule within the central nervous system (CNS) that regulates neuronal survival, connectivity and synaptic function. By using the genetically tractable organism *Dictyostelium*, we show that lithium suppresses PIP<sub>3</sub>-mediated signalling. These effects extend to the human neutrophil cell line HL60. Mechanistically, we show that lithium attenuates phosphoinositide synthesis and that its effects can be reversed by overexpression of inositol monophosphatase (IMPase), consistent with the inositol-depletion hypothesis. These results demonstrate a lithium target that is compatible with our current knowledge of the genetic predisposition for bipolar disorder. They also suggest that lithium therapy might be beneficial for other diseases caused by elevated PIP<sub>3</sub> signalling.

## INTRODUCTION

Bipolar mood disorder (manic depression) is a major, chronic psychiatric disorder with a lifetime prevalence of greater than 1%. Characterised by recurrent episodes of mania and depression, bipolar disorder presents a significant socio-economic burden (Das Gupta and Guest, 2002) and substantially lowers quality of life (Gutiérrez-Rojas et al., 2008). If untreated, it carries a high suicide rate, estimated to be 1 million deaths worldwide per year. The impact of bipolar disorder is not restricted to mental health, as it exhibits co-morbidity with cardiovascular, endocrine and metabolic disorders and is linked to an elevated inflammatory response. The molecular basis of the disorder is unknown. One of the few investigative routes available is to study the mechanism of action of mood stabiliser drugs. Lithium is the most established and commonly used mood stabiliser (Burgess et al., 2001); in addition, preliminary evidence indicates that lithium might suppress the effects of the neurodegenerative disease amyotrophic lateral sclerosis (ALS) (Fornai et al., 2008). In both cases, we lack therapeutic mechanisms. Establishing these mechanisms will lead to a better understanding of the molecular basis of bipolar mood disorder, a rationale for its use in the treatment of neurodegeneration and improved drug design; furthermore, the mechanisms may reveal other therapeutic uses for the existing mood stabilisers.

Inositol depletion is a common outcome of treatment with a number of mood stabiliser drugs (Berridge, 1985; Williams et al.,

2002). Lithium inhibits the key inositol synthetic enzymes, inositol monophosphatase (IMPase) and inositol polyphosphate phosphatase (IPP) (Hallcher and Sherman, 1980), whereas an alternative mood stabiliser, valproic acid (VPA), inhibits inositol synthase activity (Shaltiel et al., 2004). A third mood stabiliser, carbamazepine, also causes inositol depletion, but by an unknown mechanism (Williams et al., 2002; Sarkar et al., 2005; Shimshoni et al., 2009). Both lithium and VPA lower the cellular concentration of the second messenger, inositol (1,4,5)-trisphosphate [IP<sub>3</sub>, also known as Ins(1,4,5)P<sub>3</sub>], leading to the proposition that IP<sub>3</sub> might be the important target in bipolar disorder. However, despite intensive investigation, it has not been possible to directly correlate altered IP<sub>3</sub> signalling and bipolar mood disorder. This raises the possibility that mood stabilisers may suppress alternative forms of inositolide signalling.

The social amoeba *Dictyostelium discoideum* provides a good system in which to study the mechanism of action of mood stabiliser drugs and to test drug function. *Dictyostelium* development is lithium sensitive, but in contrast to other model systems, the two major lithium-sensitive signal pathways, inositol phosphate (IP) and glycogen synthase kinase-3 (GSK-3), are separated into different developmental stages. GSK-3 inhibition leads to mis-patterning of cell specification during multicellular stages of development, whereas inositol depletion substantially retards *Dictyostelium* cell aggregation (Maeda, 1970; Williams et al., 1999). Here, we demonstrate that phosphatidylinositol (3,4,5)-trisphosphate [PIP<sub>3</sub>, also known as PtdIns(3,4,5)P<sub>3</sub>] signalling is the major lithium target during *Dictyostelium* chemotaxis and is suppressed in the human neutrophil cell line HL60.

## RESULTS AND DISCUSSION

When starved, *Dictyostelium* amoebae enter a developmental programme to generate a multicellular fruiting body (Kessin, 2001).

<sup>1</sup>Cardiff School of Biosciences, Cardiff University, Museum Avenue, Cardiff CF10 3AX, UK

<sup>2</sup>School of Biological Sciences, Royal Holloway, University of London, Egham, Surrey TW20 0EX, UK

<sup>3</sup>MRC Laboratory of Molecular Biology, Hills Road, Cambridge CB2 2QH, UK

<sup>4</sup>Present address: CRUK-Beatson Institute for Cancer research, Garscube Estate, Switchback Road, Glasgow G61 1BD, UK

\*These authors contributed equally to this work

‡Author for correspondence (e-mail: harwoodaj@cf.ac.uk)

To achieve this, cells must aggregate to form a mound of 10<sup>5</sup> cells; a process that requires cell chemotaxis towards cyclic adenosine 3',5'-monophosphate (cAMP). Lithium treatment had no effect on cAMP synthesis (Fig. 1A), but did have a striking effect on chemotaxis (Fig. 1B; supplementary material Movies 1 and 2). Analysis of individual cells undergoing chemotaxis showed that lithium causes a decrease in cell speed, an increase in cell turning and a small decrease in their chemotactic index (CI), which is a measure of their ability to sense the signal gradient (supplementary material Table S1). A 56% mean decrease in cell speed correlates well with the doubling of aggregation time that has been observed previously for lithium-treated cells (Williams et al., 1999). In the majority of cases, lithium was applied acutely for 1 hour as 10 mM LiCl, however the same effect could be achieved after prolonged treatment in 2 mM LiCl (data not shown). Dictyostelium cells move by local assembly of the F-actin cytoskeleton at their leading edge. Lithium did not interfere with the basic mechanisms of F-actin polymerisation (Fig. 1C), suggesting that the lithium targets an intracellular signalling mechanism.

The effects of lithium treatment on chemotaxis strongly resembled those reported for reduced PIP<sub>3</sub> signalling (Looovers et al., 2006; Takeda et al., 2007). PIP<sub>3</sub> is rapidly induced by cAMP at the leading edge of the cell through translocation of class I phosphoinositide 3-kinases (PI3K) (Funamoto et al., 2002). Although not essential, PIP<sub>3</sub> is required for efficient chemotaxis (Andrew and Insall, 2007; Hoeller and Kay, 2007). Under the conditions used here, we found that treatment with the PI3 kinase inhibitor LY294002 closely matches that seen with lithium (Fig. 1B). A similar defect was seen for mutant cells lacking all five Dictyostelium PI3K genes (*pi3k1-5*, also known as *pikA-C*, *pikF* and *pikG*) (Hoeller and Kay, 2007) (Fig. 1B).

To probe the effect of lithium on PIP<sub>3</sub> signalling, we monitored PIP<sub>3</sub> synthesis in living cells by expression of the PIP<sub>3</sub>-specific binding protein PH<sub>CRAC</sub>-GFP (Parent et al., 1998). When globally stimulated, PIP<sub>3</sub> is generated on the entire plasma membrane causing translocation of PH<sub>CRAC</sub>-GFP. Lithium treatment

suppressed PH<sub>CRAC</sub>-GFP translocation to 40% of that seen in control cells (Fig. 2A). To confirm these observations, we monitored phosphorylation of the protein kinase B (PKB) homologue, PkbA, an event that is dependent on its membrane translocation through PH domain binding to PIP<sub>3</sub> (Kamimura et al., 2008). In control cells, phospho-PkbA (p-PkbA) could be detected 10 seconds after cAMP stimulation and was lost after 45 seconds (Fig. 2B,C). PkbA phosphorylation was not observed in the *pi3k1-5*-null mutant or in the *pkbA*-null mutant (Fig. 2B). Lithium treatment suppressed PkbA phosphorylation to 45% of control values (Fig. 2C). Finally, we directly measured PIP<sub>3</sub> synthesis following cAMP stimulation and found that new PIP<sub>3</sub> production was suppressed to 38% of that seen following control treatment; this is consistent with the observations on PkbA phosphorylation (Fig. 2C). Together, these results demonstrate that lithium suppresses PIP<sub>3</sub> signalling following cAMP stimulation and can account for the effect of lithium on chemotaxis.

Although PIP<sub>3</sub> signalling was suppressed following cAMP stimulation, other intracellular signalling pathways that are required during chemotaxis were unaffected. Dictyostelium contains two homologues of the protein kinase PKB/AKT1, PkbA and PkgB (also known as PKBR1) (Meili et al., 2000). Both are phosphorylated in response to cAMP stimulation, however only PkbA phosphorylation is dependent on PIP<sub>3</sub> (Kamimura et al., 2008). Consistent with a specific effect on PIP<sub>3</sub>, we found that PkgB phosphorylation is unaffected by lithium treatment (Fig. 2B). Cyclic guanosine 3',5'-monophosphate (cGMP) mediates an additional independent regulator of chemotaxis (Veltman and van Haastert, 2008), however lithium has no effect on cGMP synthesis (Fig. 2D). Finally, ablation of the Dictyostelium PLC (*plc*) and IP<sub>3</sub> receptor (*iplA*) genes does not suppress chemotaxis (Drayer et al., 1994; Traynor et al., 2000) (Fig. 1B and data not shown), indicating that inhibition of IP<sub>3</sub> production or calcium release by lithium is not related to the effects of lithium on chemotaxis.

Following cAMP stimulation, PI3K translocates to the leading edge of the cell, whereas the PIP<sub>3</sub> phosphatase PTEN is lost from

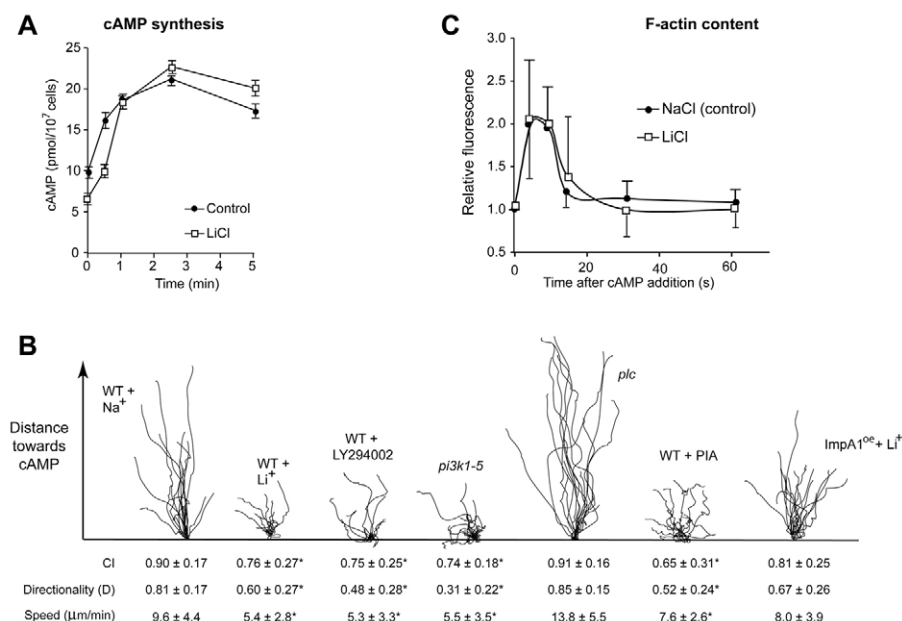

**Fig. 1. Effect of lithium on Dictyostelium cells undergoing chemotaxis.** (A) Wild-type cells treated with 10 mM LiCl or NaCl (control) were stimulated with 10 μM of 2'-deoxy-cAMP and cAMP production was then measured over 5 minutes. (B) Analysis of chemotaxis for wild-type and mutant cell strains after lithium or control treatment. Representative tracks are shown for each experiment and mean ± s.e.m. is shown for the parameters: chemotactic index (CI), directionality (D) (a measure of cell turning where 1 is a straight line) and speed. (C) Wild-type cells were treated with 10 mM LiCl or 10 mM NaCl (control) and the amount of F-actin was measured through TRITC-phalloidin binding. The graph shows the fluorescence at time intervals after cAMP stimulation, displayed as relative values compared with prestimulation fluorescence. All data points are the mean ± s.e.m. of three independent experiments.

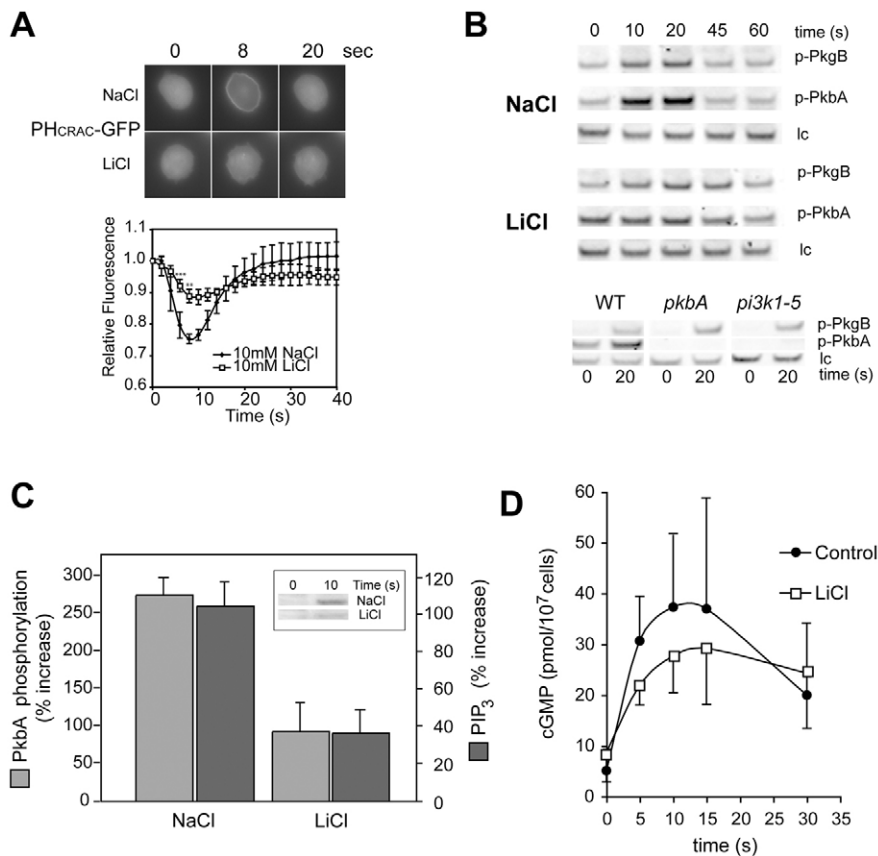**Fig. 2. Lithium suppresses PIP<sub>3</sub> signalling.**

(A) Translocation of the PIP<sub>3</sub> marker PH<sub>CRAC</sub>-GFP to the plasma membrane upon uniform stimulation of control and lithium-treated cells with 1  $\mu$ M cAMP. The graph shows quantification of PH<sub>CRAC</sub>-GFP by measuring the cytosolic fluorescence intensity. The values plotted are the means of three independent experiments  $\pm$  s.e.m. (B) Lithium inhibition of PKB. Aggregation-competent cells were treated for 1 hour with 10 mM LiCl or NaCl (control) and then stimulated with 1  $\mu$ M cAMP. Samples were analysed by western blotting with an antibody that recognises phosphorylation at both threonine 278 on PkbA and threonine 309 on PkgB (Kamimura et al., 2008) (Ic is a non-specific band that acts as a loading control). To confirm specificity, the same antibody was used on wild-type cells, *pkbA*-null mutant cells and *pi3k1-5*-null mutant cells that cannot induce PIP<sub>3</sub>-dependent phosphorylation. (C) Quantification of PIP<sub>3</sub> synthesis. Cells were stimulated with cAMP under the same conditions as in (B). Phosphorylation of PkbA was measured using an anti-phosphothreonine antibody, as described by Lim et al. (Lim et al., 2001). A direct measurement of the quantity of PIP<sub>3</sub> was made by using a PIP<sub>3</sub> mass ELISA. The results are displayed as percentage increase over the unstimulated level (mean  $\pm$  s.e.m.). (D) Wild-type cells treated with 10 mM LiCl or NaCl (control) were stimulated with 1  $\mu$ M cAMP and cGMP synthesis was then measured over 30 seconds.

this region. Lithium had no effect on either PI3K translocation to the plasma membrane or PTEN loss from the membrane following cAMP stimulation (Fig. 3E; supplementary material Fig. S1A), indicating that cAMP-stimulated PIP<sub>3</sub> synthesis is not suppressed by loss of PI3K or elevated PTEN activity. We therefore investigated a third possibility, which was whether lithium reduced the amount of the PI3K substrate phosphatidylinositol (4,5)-bisphosphate [PIP<sub>2</sub>, also known as PtdIns(4,5)P<sub>2</sub>]. We could not detect any lithium-induced changes in the steady-state concentration of PIP<sub>2</sub>, however we did detect a 50% and 63% decrease in the rate of PIP and PIP<sub>2</sub> synthesis, respectively (Fig. 3A,B; supplementary material Fig. S1B); this level of reduction closely matches that calculated for cAMP-induced PIP<sub>3</sub> synthesis. These observations suggest that there are two pools of PIP<sub>2</sub>. First, there is a slowly metabolised pool that is not involved in cell signalling during chemotaxis and that is insensitive to lithium treatment. Most of this PIP<sub>2</sub> is likely to be bound to proteins, particularly those regulating the actin cytoskeleton (Janmey and Lindberg, 2004). Second, there is a rapidly metabolised pool, which is required for the synthesis of PIP<sub>3</sub> during chemotaxis and is susceptible to lithium inhibition. In Dictyostelium, the amount of PIP<sub>2</sub> within the lithium-insensitive pool is much greater than that involved in cell signalling; we calculated that there was a 50- and 200-fold excess of total PIP<sub>2</sub> concentration over IP<sub>3</sub> and PIP<sub>3</sub>, respectively. The presence of a large non-dynamic PIP<sub>2</sub> pool that masks the effects of lithium on PIP<sub>2</sub>-mediated signalling might be one reason why, in many systems, it has proven difficult to measure substantial changes in PIP and PIP<sub>2</sub>.

The behaviour of Dictyostelium PTEN offers a means to directly monitor the rapidly metabolised, lithium-sensitive PIP<sub>2</sub> pool. In Dictyostelium, PTEN localisation to the plasma membrane is dependent on PIP<sub>2</sub>, and a reduction in PIP<sub>2</sub> leads to a reduced rate of PTEN binding (Vazquez et al., 2006). Lithium treatment of unstimulated cells reduced the amount of PTEN-GFP associated with the plasma membrane (Fig. 3C), consistent with a reduction of PIP<sub>2</sub>. In agreement with these observations, lithium treatment of unstimulated cells increased PIP<sub>3</sub> and p-PkbA compared with control-treated cells (Fig. 3D).

Although a good marker for changes in the PIP<sub>2</sub> signalling pool, the change in PTEN behaviour following lithium treatment is unlikely to have a major effect on cell signalling. This is because cAMP stimulation removes PTEN from the plasma membrane and hence stimulated production of PIP<sub>3</sub> arises solely from PI3K activation. As lithium treatment only alters the amount of bound PTEN and not its relocation from the membrane (Fig. 3E), the reduced amount of newly synthesised PIP<sub>3</sub> following cAMP stimulation is probably the result of suppressed PIP<sub>3</sub> generation. During chemotaxis, cells generate a steep gradient of PIP<sub>3</sub>, with high concentrations at the leading edge of the cell, and lithium treatment will act to flatten this gradient. The effects we observe following lithium treatment match the phenotype of *pi3k1-5*-null mutants and not that of *pten*-null mutants (Iijima and Devreotes, 2002; Hoeller and Kay, 2007; Kortholt et al., 2007), suggesting that a failure of PIP<sub>3</sub> synthesis, rather than reduced breakdown of the protein, gives rise to the effect of lithium.

A number of experiments suggest that the effects of lithium on phosphoinositide signalling may have arisen through inositol depletion. First, propylisopropylacetic acid (PIA), a specific inhibitor of myo-inositol synthesis (Shimshoni et al., 2007), has a similar effect on chemotaxis to lithium (Fig. 1B). Second, IMPase is inhibited by lithium through an uncompetitive mechanism

(Atack et al., 1995), which means that the inhibition can be reversed by increasing the concentration of the enzyme. Consistent with such a mechanism, lithium sensitivity is suppressed by overexpression of the Dictyostelium IMPase gene (*impa1*) (Fig. 1B). This lithium resistance can also be observed at the molecular level where *impa1* overexpression counteracts the effect of lithium on PkbA phosphorylation and reverses the inhibition of PIP/PIP<sub>2</sub> synthesis (Fig. 3B,F).

These observations indicate that PIP<sub>3</sub> is the major target of lithium in Dictyostelium chemotaxis. To examine whether this is unique to Dictyostelium, we investigated the effect of lithium on the human cell line HL60 following their differentiation into neutrophil-like cells that are capable of chemotaxis (Collins et al., 1979). These differentiated HL60 cells undergo chemotaxis to the peptide fMLP in a process that involves PIP<sub>3</sub> (Cui et al., 2000). Global stimulation using a chemoattractant generates PIP<sub>3</sub> on the plasma membrane, which we monitored by plasma membrane translocation of the PIP<sub>3</sub>-binding protein PH<sub>Akt</sub>-GFP (Servant et al., 2000) (Fig. 4A). Consistent with our Dictyostelium observations, PH<sub>Akt</sub>-GFP translocation was attenuated following lithium treatment (Fig. 4B). This indicates that the effects of lithium on PIP<sub>3</sub> signalling are conserved in human cells, extending the repertoire of the effects of lithium on inositide signalling.

In conclusion, we have shown that lithium suppresses PIP<sub>3</sub> signalling. These results have implications beyond the regulation of chemotaxis and could explain the therapeutic efficacy of lithium in the treatment of bipolar disorder. PIP<sub>3</sub> signalling in the nervous system is important for axonal guidance, synaptogenesis and synaptic transmission (Zhou et al., 2004; Ramsey et al., 2005; Chadborn et al., 2006; Martin-Pena et al., 2006; Xu et al., 2007), and mice with elevated PIP<sub>3</sub> levels suffer seizures (Backman et al., 2001). Lithium might, therefore, alter these processes through an

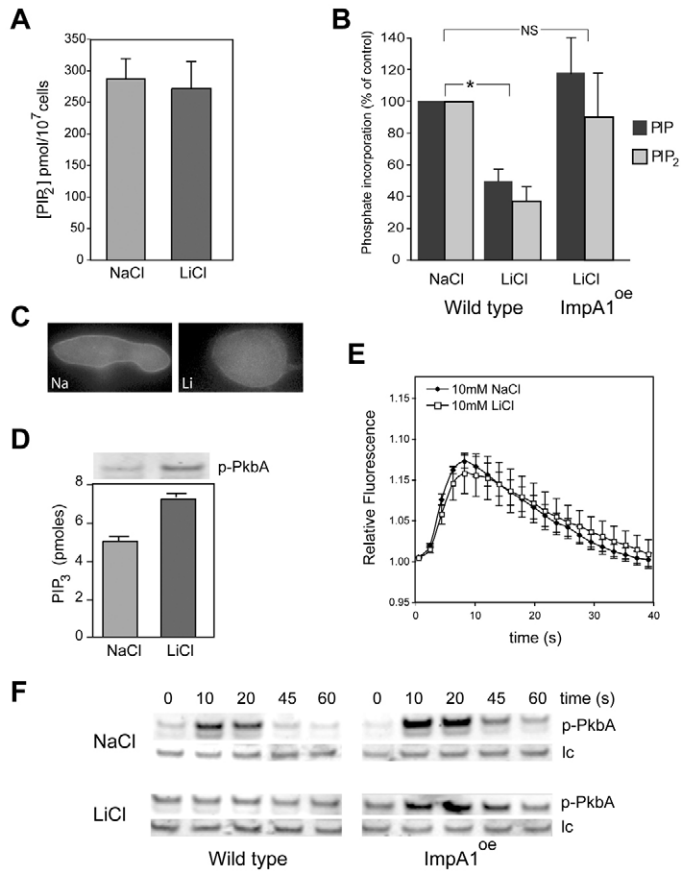

**Fig. 3. Lithium effects on PIP synthesis.** (A) The total mass of PIP<sub>2</sub> in Dictyostelium cells was measured by alkaline hydrolysis of membrane lipids followed by measuring the released IP<sub>3</sub> (Chilvers et al., 1991). Dictyostelium cells contain between 270–290 picomoles of PIP<sub>2</sub> and lithium-treated cells showed no detectable difference compared with control (NaCl) cells. (B) Measurement of PIP and PIP<sub>2</sub> following treatment with 10 mM LiCl. Wild-type cells show a significant ( $P < 0.01$ , paired  $t$ -test) decrease in both PIP and PIP<sub>2</sub> following lithium treatment compared with NaCl control treatment. This decrease is reversed by increased expression of the *ImpA1* protein. (C) Lithium treatment decreases the amount of PTEN-GFP associated with the plasma membrane of cells undergoing chemotaxis. Images show typical cells. (D) Lithium treatment increases the basal level of PIP<sub>3</sub> and p-PkbA in unstimulated cells. (E) Wild-type cells expressing PTEN-GFP were pulsed for 5 hours and treated with 10 mM NaCl or LiCl for 1 hour. Translocation following uniform stimulation with 1  $\mu$ M cAMP was quantified by measuring the change in cytosolic fluorescence intensity. Values plotted are the means of three independent experiments and error bars indicate the s.e.m. Note that the fluorescence intensity measurements are the relative changes compared with the unstimulated level that has been normalized for each cell. This means that although lithium-treated cells had less PTEN on their membrane in the unstimulated state, the kinetics of loss from the membrane remained the same as that seen for the NaCl control-treated cells. (F) A cDNA encoding *ImpA1* was expressed in wild-type Dictyostelium cells from the *actin15* gene promoter. Samples were analysed for p-PkbA content as in Fig. 2B.

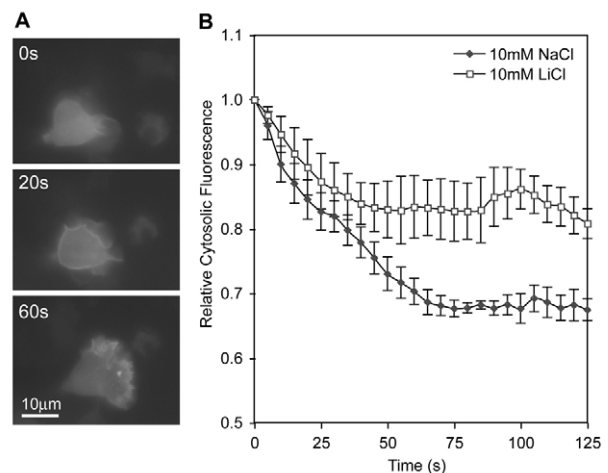

**Fig. 4. Lithium suppresses PIP<sub>3</sub> signalling in HL60 cells.** (A) HL60 cells expressing PH<sub>Akt</sub>-GFP were differentiated to neutrophils and then globally stimulated with fMLP. PH<sub>Akt</sub>-GFP translocates from the cytosol to the plasma membrane within 20 seconds. At 60 seconds, cells have returned to a polarised state with localised at the leading edge. (B) Translocation of the PH<sub>Akt</sub>-GFP is measured by the same method used in Dictyostelium. Graph shows quantification by measuring the cytosolic fluorescence intensity. Values plotted are the means of three independent experiments  $\pm$  s.e.m.

effect on PIP<sub>3</sub> signalling. Furthermore, bipolar mood disorder has a strong genetic predisposition but is a complex genetic trait that probably involves combinations of multiple loci (Craddock and Jones, 1999). As yet, no susceptibility gene has been unambiguously identified but, interestingly, many of the candidate genes currently under investigation converge on the PIP<sub>3</sub>- and PKB-mediated signal pathway (Silverstone et al., 2005; Carter, 2007). The results presented here provide a mechanism that might directly couple current genetic studies with a target of lithium therapy.

Conversely, suppression of PIP<sub>3</sub> signalling might open up therapeutic uses for lithium. In human patients, aberrant PIP<sub>3</sub> signalling is linked to macrocephaly, mental retardation, cerebellar hypertrophy, ataxia, seizures, epilepsy and autism (Li et al., 1997; Yates, 2006). Beyond the nervous system, regulators of PIP<sub>3</sub> signalling are frequently mutated in tumours (Leslie and Downes, 2004; Barber and Welch, 2006) and familial PTEN mutations are associated with a number of syndromes that cause hamartomas, such as Cowden, Bannayan-Riley-Ruvalcaba and Proteus syndromes (Eng, 2003). The discovery that suppression of PIP<sub>3</sub> signalling is a major consequence of lithium treatment offers both an insight into the mechanism of lithium action within the nervous system and suggests therapeutic opportunities for this well-established drug, such as in the control of tumour progression.

## METHODS

### Analysis of Dictyostelium chemotaxis

*D. discoideum* strain AX2 was used in all assays. Washed log-phase cells were developed in shaking suspension in KK2 buffer for 5 hours at  $5 \times 10^6$  cells/ml with 6-minute pulses of 100nM cAMP. All drug and control treatments were added only for the final hour, except for PIA, which is required throughout pulsing. Pulsed cells were placed in a Z02 Zigmund chamber (Neuro Probe) (Zigmund, 1977) with 1  $\mu$ M of cAMP/KK2 as the source and KK2 as the sink. All solutions contained the appropriate drugs to ensure continued treatment. Cells were recorded after 20 minutes using video microscopy with a 20 $\times$  objective and by taking DIC images every 6 seconds. Cell movement was analysed using the Dynamic Image Analysis System (DIAS) (version 3.4.1, Soll Technologies, Iowa City, IA) (Soll et al., 2001). For statistical analysis, we used Kruskal-Wallis and Mann-Whitney *U* tests, with a post-hoc Dunn test for multiple comparison.

### Cell signalling assays

cAMP and cGMP were measured as described previously (Snaar-Jagalska and Van Haastert, 1994) using isotope dilution assay kits (GE healthcare). Actin polymerisation was measured using a modified version of the method of Hall et al. (Hall et al., 1988). Pulsed cells ( $2.5 \times 10^7$  cells/ml) were stimulated with 1  $\mu$ M cAMP and 100  $\mu$ l aliquots were fixed at the set time intervals by addition of 900  $\mu$ l of stop solution (3.7% formaldehyde, 0.1% Triton X-100, 0.5  $\mu$ M TRITC-phalloidin, 10 mM PIPES, 5 mM EGTA, 2 mM MgCl<sub>2</sub>, pH 6.8). Cells were resuspended in 800  $\mu$ l of methanol and F-actin was assayed as fluorescence intensity at 540/590 nm. Wild-type cells were transformed by electroporation with the plasmids WF38 (PH<sub>CRAC</sub>-GFP) (Parent et al., 1998), PTEN-GFP (Iijima and Devreotes, 2002), pOH30 (YFP-PI3K2N) or pPH<sub>PLC</sub> (PLC- $\delta$ 1-PH-GFP) (Hoeller and Kay, 2007). Pulsed cells were stimulated by the addition of 1  $\mu$ M of cAMP. Protein translocation was recorded by

## TRANSLATIONAL IMPACT

### Clinical issue

Bipolar mood disorder, often called manic depression, is a long-term psychiatric illness that causes dramatic changes in energy, behaviour and mood. The underlying cause, or causes, of this disorder are unknown and there is no cure for this illness. In most cases, the disease is treated with mood-stabilising medications. Of these, lithium is the most common and possibly the best; however, despite over 50 years of clinical use, its therapeutic mechanisms remain unknown.

At the cellular level, lithium causes depletion of myo-inositol. One prevalent hypothesis is that this reduces inositol (1,4,5)-trisphosphate [IP<sub>3</sub>, also known as Ins(1,4,5)P<sub>3</sub>], an important intracellular signalling molecule. So far, extensive investigation has failed to establish whether inhibition of IP<sub>3</sub> signalling is the therapeutic mechanism for lithium or whether changes in IP<sub>3</sub> are associated with the disorder.

### Results

This study provides the first demonstration that lithium has a major effect on phosphatidylinositol (3,4,5)-trisphosphate [PIP<sub>3</sub>, also known as PtdIns(3,4,5)P<sub>3</sub>], an alternative inositol-based signalling molecule. Lithium suppresses PIP<sub>3</sub> signalling in both the social amoeba *Dictyostelium* and cultured human neutrophil cells. It does this by suppressing synthesis of the phosphoinositide precursors of PIP<sub>3</sub>. Increased expression of the enzyme inositol monophosphatase (IMPase) reverses the effects of lithium, suggesting that lithium acts through inositol depletion. Interestingly, in the absence of lithium, elevated IMPase leads to elevated PIP<sub>3</sub> signalling.

### Implications and future directions

These findings have important implications in lithium therapy and neurochemistry. PIP<sub>3</sub> is a major signalling molecule in neurons and suppression of PIP<sub>3</sub> signalling may have significant neuromodulatory effects in bipolar mood disorder patients. There is a strong familial predisposition for bipolar mood disorder suggesting a genetic component. These findings support further investigation of genes associated with PIP<sub>3</sub> signalling, such as the IMPase gene *IMPA2*. The ability of lithium to target PIP<sub>3</sub> might also lead to new therapeutic uses for lithium. Aberrant PIP<sub>3</sub> signalling is linked to a range of neurological diseases, including macrocephaly, epilepsy and autism. Beyond the nervous system, regulators of PIP<sub>3</sub> signalling are frequently mutated in tumours and inheritable diseases. Furthermore, the mood stabilisers valproic acid and carbamazepine also deplete inositol and may be used to suppress PIP<sub>3</sub> signalling. Unlike lithium, these drugs can be chemically modified, presenting a route to new generations of PIP<sub>3</sub> inhibitors.

doi:10.1242/dmm.003053

fluorescence video microscope with a 60 $\times$  objective, and the fluorescence intensity of the cytosol of each cell in each frame was measured using ImageJ software and normalised to the prestimulated level of the same cell. For PKB phosphorylation, pulsed cells were stimulated with 1  $\mu$ M of cAMP and samples were lysed directly into 100  $\mu$ l of 2 $\times$ LDS loading buffer (Invitrogen) supplemented with 100 mM NaF, 0.4 mM Na<sub>3</sub>VO<sub>4</sub> and 3 mM EDTA on ice. Samples were separated by electrophoresis using 3-8% NuPage tris-acetate gels (Invitrogen), blotted onto nitrocellulose membrane (Amersham) and then probed with a rabbit anti-phospho PKC (pan) antibody (190D10, Cell Signalling Technology) or, for quantification, with an anti-phosphothreonine antibody (Lim et al., 2001). PIP<sub>3</sub> was measured directly by PIP<sub>3</sub> mass ELISA (Echelon). Phosphoinositide turnover was monitored by incubating chemotactic-competent cells in internal buffer [139 mM sodium glutamate, 5 mM glucose, 5 mM EGTA, 20 mM PIPES at pH 6.6, 1 mM magnesium sulphate, 0.03% saponin, 0.005 volume of

protease inhibitor cocktail 1 and 2 (Sigma), and 5  $\mu$ Ci of  $\gamma$ -<sup>32</sup>P-labelled adenosine triphosphate (ATP)] for exactly 6 minutes, followed by lysis in acidified methanol, extraction in water-methanol-chloroform (1:2:1), and separation by thin-layer chromatography on silica gel 60 TLC plates (VWR) in a solvent mix (chloroform-acetone-methanol-acetic acid-distilled water in a ratio of 40:15:13:12:7). <sup>32</sup>P lipid incorporation into lipids was measured using a Typhoon phosphoimager (Pawolleck and Williams, 2009).

### Culture and stimulation of HL60 cells

HL60 cells were grown at 37°C in RPMI 1640 medium supplemented with 25 mM HEPES, 10% fetal bovine serum, 100  $\mu$ g/ml streptomycin, 100 U/ml penicillin and 2 mM L-glutamine. Before stimulation, the cells were differentiated into neutrophil-like cells in 8-well chamber slides (Lab-Tek) by the addition of 1.3% DMSO to the medium for 5 days. Cells were stimulated by pipetting fMLP (Sigma) directly into each chamber, to a final concentration of 1  $\mu$ M. Translocation of the GFP marker to the membrane was quantified as for Dictyostelium cells, with images taken at 5 second intervals.

### ACKNOWLEDGEMENTS

This work was supported by a Wellcome Trust Programme Grant to A.J.H. We wish to thank Maurice Hallet and Trevor Dale for helpful discussions.

### COMPETING INTERESTS

The authors declare no competing financial interests.

### AUTHOR CONTRIBUTIONS

A.J.H., J.K., R.T. and R.S.B.W. conceived and designed the experiments; J.K., R.T., J.V.R., O.P., B.O. and J.R. performed the experiments; O.H. contributed strains and plasmids; A.J.H., J.K. and R.T. wrote the paper.

### SUPPLEMENTARY MATERIAL

Supplementary material for this article is available at <http://dmm.biologists.org/lookup/suppl/doi:10.1242/dmm.001271/-/DC1>

Received 4 August 2008; Accepted 21 January 2009.

### REFERENCES

- Andrew, N. and Insall, R. H. (2007). Chemotaxis in shallow gradients is mediated independently of PtdIns 3-kinase by biased choices between random protrusions. *Nat. Cell Biol.* **9**, 193-200.
- Attack, J. R., Broughton, H. B. and Pollack, S. J. (1995). Structure and mechanism of inositol monophosphatase. *FEBS Lett.* **361**, 1-7.
- Backman, S. A., Stambolic, V., Suzuki, A., Haight, J., Elia, A., Pretorius, J., Tsao, M. S., Shannon, P., Bolon, B., Ivy, G. O. et al. (2001). Deletion of Pten in mouse brain causes seizures, ataxia and defects in soma size resembling Lhermitte-Duclos disease. *Nat. Genet.* **29**, 396-403.
- Barber, M. A. and Welch, H. C. (2006). PI3K and RAC signalling in leukocyte and cancer cell migration. *Bull. Cancer* **93**, E44-E52.
- Berridge, M. J. (1985). Phosphoinositides and signal transductions. *Rev. Clin. Basic Pharm.* **5 Suppl.**, 55-135.
- Burgess, S., Geddes, J., Hawton, K., Townsend, E., Jamison, K. and Goodwin, G. (2001). Lithium for maintenance treatment of mood disorders. *Cochrane Database Syst. Rev.* CD003013.
- Carter, C. J. (2007). Multiple genes and factors associated with bipolar disorder converge on growth factor and stress activated kinase pathways controlling translation initiation: implications for oligodendrocyte viability. *Neurochem. Int.* **50**, 461-490.
- Chadborn, N. H., Ahmed, A. I., Holt, M. R., Prinjha, R., Dunn, G. A., Jones, G. E. and Eickholt, B. J. (2006). PTEN couples Sema3A signalling to growth cone collapse. *J. Cell Sci.* **119**, 951-957.
- Chilvers, E. R., Batty, I. H., Challiss, R. A., Barnes, P. J. and Nahorski, S. R. (1991). Determination of mass changes in phosphatidylinositol 4,5-bisphosphate and evidence for agonist-stimulated metabolism of inositol 1,4,5-trisphosphate in airway smooth muscle. *Biochem. J.* **275**, 373-379.
- Collins, S. J., Ruscetti, F. W., Gallagher, R. E. and Gallo, R. C. (1979). Normal functional characteristics of cultured human promyelocytic leukemia cells (HL-60) after induction of differentiation by dimethylsulfoxide. *J. Exp. Med.* **149**, 969-974.
- Craddock, N. and Jones, I. (1999). Genetics of bipolar disorder. *J. Med. Genet.* **36**, 585-594.
- Cui, Y. D., Inanami, O., Yamamori, T., Niwa, K., Nagahata, H. and Kuwabara, M. (2000). FMLP-induced formation of F-actin in HL60 cells is dependent on PI3-K but not on intracellular Ca<sup>2+</sup>, PKC, ERK or p38 MAPK. *Inflamm. Res.* **49**, 684-691.
- Das Gupta, R. and Guest, J. F. (2002). Annual cost of bipolar disorder to UK society. *Br. J. Psychiatry* **180**, 227-233.
- Drayer, A. L., Van der Kaay, J., Mayr, G. W. and Van Haastert, P. J. M. (1994). Role of phospholipase C in Dictyostelium-formation of inositol 1,4,5-trisphosphate and normal development in cells lacking phospholipase C activity. *EMBO J.* **13**, 1601-1609.
- Eng, C. (2003). PTEN: one gene, many syndromes. *Hum. Mutat.* **22**, 183-198.
- Fornai, F., Longone, P., Cafaro, L., Kastsuchenka, O., Ferrucci, M., Manca, M. L., Lazzeri, G., Spalloni, A., Bellio, N., Lenzi, P. et al. (2008). Lithium delays progression of amyotrophic lateral sclerosis. *Proc. Natl. Acad. Sci. USA* **105**, 2052-2057.
- Funamoto, S., Meili, R., Lee, S., Parry, L. and Firtel, R. A. (2002). Spatial and temporal regulation of 3-phosphoinositides by PI 3-kinase and PTEN mediates chemotaxis. *Cell* **109**, 611-623.
- Gutiérrez-Rojas, L., Gurpegui, M., Ayuso-Mateos, J. L., Gutiérrez-Ariza, J. A., Ruiz-Veguilla, M. and Jurado, D. (2008). Quality of life in bipolar disorder patients: a comparison with a general population sample. *Bipolar Disord.* **10**, 625-634.
- Hall, A. L., Schlein, A. and Condeelis, J. (1988). Relationship of pseudopod extension to chemotactic hormone-induced actin polymerisation in amoeboid cells. *J. Cell Biochem.* **37**, 285-299.
- Hallcher, L. M. and Sherman, W. R. (1980). The effects of lithium ion and other agents on the activity of myo-inositol-1-phosphatase from bovine brain. *J. Biol. Chem.* **255**, 10896-10901.
- Hoeller, O. and Kay, R. R. (2007). Chemotaxis in the absence of PIP3 gradients. *Curr. Biol.* **17**, 813-817.
- Iijima, M. and Devreotes, P. (2002). Tumor suppressor PTEN mediates sensing of chemoattractant gradients. *Cell* **109**, 599-610.
- Janmey, P. A. and Lindberg, U. (2004). Cytoskeletal regulation: rich in lipids. *Nat. Rev. Mol. Cell Biol.* **5**, 658-666.
- Kamimura, Y., Xiong, Y., Iglesias, P. A., Hoeller, O., Bolourani, P. and Devreotes, P. N. (2008). PIP(3)-independent activation of TorC2 and PKB at the cell's leading edge mediates chemotaxis. *Curr. Biol.* **18**, 1034-1043.
- Kessler, R. H. (2001). *Dictyostelium: Evolution, Cell Biology, and The Development Of Multicellularity*. Cambridge: Cambridge University Press.
- Kortholt, A., King, J. S., Keizer-Gunnink, I., Harwood, A. J. and Van Haastert, P. J. (2007). Phospholipase C Regulation of Phosphatidylinositol 3,4,5-trisphosphate-mediated Chemotaxis. *Mol. Biol. Cell* **18**, 4772-4779.
- Leslie, N. R. and Downes, C. P. (2004). PTEN function: how normal cells control it and tumour cells lose it. *Biochem. J.* **382**, 1-11.
- Li, J., Yen, C., Liaw, D., Podsypanina, K., Bose, S., Wang, S. I., Puc, J., Miliareis, C., Rodgers, L., McCombie, R. et al. (1997). PTEN, a putative protein tyrosine phosphatase gene mutated in human brain, breast, and prostate cancer. *Science* **275**, 1943-1947.
- Lim, C. J., Spiegelman, G. B. and Weeks, G. (2001). RasC is required for optimal activation of adenylyl cyclase and Akt/PKB during aggregation. *EMBO J.* **20**, 4490-4499.
- Loovers, H. M., Postma, M., Keizer-Gunnink, I., Huang, Y. E., Devreotes, P. N. and van Haastert, P. J. (2006). Distinct roles of PI(3,4,5)P3 during chemoattractant signalling in Dictyostelium: a quantitative in vivo analysis by inhibition of PI3-kinase. *Mol. Biol. Cell* **17**, 1503-1513.
- Maeda, Y. (1970). Influence of ionic conditions on cell differentiation and morphogenesis of the cellular slime molds. *Dev. Growth Differ.* **12**, 217-227.
- Martin-Pena, A., Acebes, A., Rodriguez, J. R., Sorribes, A., de Polavieja, G. G., Fernandez-Funez, P. and Ferrus, A. (2006). Age-independent synaptogenesis by phosphoinositide 3 kinase. *J. Neurosci.* **26**, 10199-10208.
- Meili, R., Ellsworth, C. and Firtel, R. A. (2000). A novel Akt/PKB-related kinase is essential for morphogenesis in Dictyostelium. *Curr. Biol.* **10**, 708-717.
- Parent, C. A., Blacklock, B. J., Froehlich, W. M., Murphy, D. B. and Devreotes, P. N. (1998). G protein signalling events are activated at the leading edge of chemotactic cells. *Cell* **95**, 81-91.
- Pawolleck, N. and Williams, R. (2009). Quantifying in vivo phosphoinositide turnover in chemotactically-competent Dictyostelium cells. In *Chemotaxis: Methods and Protocols (Methods in Molecular Biology)* (ed. J. Tian and H. Dale). Totowa, NJ: Humana Press (in press).

- Ramsey, M. M., Adams, M. M., Ariwodola, O. J., Sonntag, W. E. and Weiner, J. L. (2005). Functional characterization of des-IGF-1 action at excitatory synapses in the CA1 region of rat hippocampus. *J. Neurophysiol.* **94**, 247-254.
- Sarkar, S., Floto, R. A., Berger, Z., Imarisio, S., Cordenier, A., Pasco, M., Cook, L. J. and Rubinsztein, D. C. (2005). Lithium induces autophagy by inhibiting inositol monophosphatase. *J. Cell Biol.* **170**, 1101-1111.
- Servant, G., Weiner, O. D., Herzmark, P., Balla, T., Sedat, J. W. and Bourne, H. R. (2000). Polarization of chemoattractant receptor signalling during neutrophil chemotaxis. *Science* **287**, 1037-1040.
- Shaltiel, G., Shamir, A., Shapiro, J., Ding, D., Dalton, E., Bialer, M., Harwood, A. J., Belmaker, R. H., Greenberg, M. L. and Agam, G. (2004). Valproate decreases inositol biosynthesis. *Biol. Psychiatry* **56**, 868-874.
- Shimshoni, J. A., Dalton, E. C., Jenkins, A., Eyal, S., Ewan, K., Williams, R. S., Pessah, N., Yagen, B., Harwood, A. J. and Bialer, M. (2007). The effects of central nervous system-active valproic acid constitutional isomers, cyclopropyl analogs, and amide derivatives on neuronal growth cone behavior. *Mol. Pharmacol.* **71**, 884-892.
- Shimshoni, J. A., Dalton, E. C., Yagenc, B., Bialer, M. and Harwood, A. J. (2009). Evaluation of the effects of propylisopropylacetic acid (PIA) on neuronal growth cone morphology. *Neuropharmacology* **56**, 831-837.
- Silverstone, P. H., McGrath, B. M. and Kim, H. (2005). Bipolar disorder and myo-inositol: a review of the magnetic resonance spectroscopy findings. *Bipolar Disord.* **7**, 1-10.
- Snaar-Jagalska, B. E. and Van Haastert, P. J. (1994). G-protein assays in Dictyostelium. *Methods Enzymol.* **237**, 387-408.
- Soll, D. R., Wessels, D., Voss, E. and Johnson, O. (2001). Computer-assisted systems for the analysis of amoeboid cell motility. *Methods Mol. Biol.* **161**, 45-58.
- Takeda, K., Sasaki, A. T., Ha, H., Seung, H. A. and Firtel, R. A. (2007). Role of phosphatidylinositol 3-kinases in chemotaxis in Dictyostelium. *J. Biol. Chem.* **282**, 11874-11884.
- Traynor, D., Milne, J. L., Insall, R. H. and Kay, R. R. (2000). Ca<sup>2+</sup> signalling is not required for chemotaxis in Dictyostelium. *EMBO J.* **19**, 4846-4854.
- Vazquez, F., Matsuoka, S., Sellers, W. R., Yanagida, T., Ueda, M. and Devreotes, P. N. (2006). Tumor suppressor PTEN acts through dynamic interaction with the plasma membrane. *Proc. Natl. Acad. Sci. USA* **103**, 3633-3638.
- Veltman, D. M. and van Haastert, P. J. (2008). The role of cGMP and the rear of the cell in Dictyostelium chemotaxis and cell streaming. *J. Cell Sci.* **121**, 120-127.
- Williams, R. S., Eames, M., Ryves, W. J., Viggars, J. and Harwood, A. J. (1999). Loss of a prolyl oligopeptidase confers resistance to lithium by elevation of inositol (1,4,5) trisphosphate. *EMBO J.* **18**, 2734-2745.
- Williams, R. S., Cheng, L., Mudge, A. W. and Harwood, A. J. (2002). A common mechanism of action for three mood-stabilizing drugs. *Nature* **417**, 292-295.
- Xu, X., Muller-Taubenberger, A., Adley, K. E., Pawolleck, N., Lee, V. W., Wiedemann, C., Sihra, T. S., Maniak, M., Jin, T. and Williams, R. S. (2007). Attenuation of phospholipid signalling provides a novel mechanism for the action of valproic acid. *Eukaryot. Cell* **6**, 899-906.
- Yates, J. R. (2006). Tuberous sclerosis. *Eur. J. Hum. Genet.* **14**, 1065-1073.
- Zhou, F. Q., Zhou, J., Dedhar, S., Wu, Y. H. and Snider, W. D. (2004). NGF-induced axon growth is mediated by localized inactivation of GSK-3beta and functions of the microtubule plus end binding protein APC. *Neuron* **42**, 897-912.
- Zigmond, S. H. (1977). Ability of polymorphonuclear leukocytes to orient in gradients of chemotactic factors. *J. Cell Biol.* **75**, 606-616.
